# Supplementary material for: Emergence of Plasmodium vivax Resistance to Chloroquine in French Guiana
Source: PubMed Central journal article supplement (PMC6811453; doi:10.1128/aac.02116-18), 2019-10-22
Supplement: AAC.02116-18-s0001.pdf [file AAC.02116-18-s0001.pdf]

# 1 SUPPORTING INFORMATION

## 2 S1 Table : Microsatellite characterization of *P. vivax* infections

| Markers                | Primary PCR                    |                    |                           |              | Nested PCR                        |                    |                           |              |
|------------------------|--------------------------------|--------------------|---------------------------|--------------|-----------------------------------|--------------------|---------------------------|--------------|
|                        | Primers 5' → 3'                | Hybridization (°C) | [MgCl <sub>2</sub> ] (mM) | Cycle number | Primers 5' → 3'                   | Hybridization (°C) | [MgCl <sub>2</sub> ] (mM) | Cycle number |
| <b>3.27 (locus1)</b>   | A180 : F-GCGATTAAGCTGCACTGAAT  | 60.0               | 2                         | 20           | A181 : F-D3*-ACCCTCCAATGAGCACAAG  | 60.0               | 2                         | 25           |
|                        | A182 : R-TCCAAATGTATGTGCAGTCG  |                    |                           |              | A182 : R-TCCAAATGTATGTGCAGTCG     |                    |                           |              |
| <b>8.504 (locus6)</b>  | A171 : F-TTCTTTCATAGGAATAGCTGC | 55.0               | 2                         | 20           | A172 : F-D3*-TCTTCTCGTCTCCTTTCTG  | 60.0               | 2                         | 25           |
|                        | A173 : R-AGTGTGTGTAGTGGGTGGAG  |                    |                           |              | A173 : R-AGTGTGTGTAGTGGGTGGAG     |                    |                           |              |
| <b>11.162 (locus5)</b> | A174 : F-GTAGGAACACGCCACGTT    | 60.0               | 2                         | 20           | A175 : F-D4*-TTTGTTAGGAGATCCGTCTG | 60.0               | 3                         | 25           |
|                        | A176 : R-TTAAATGACACTTTGGCTTCC |                    |                           |              | A176 : R-TTAAATGACACTTTGGCTTCC    |                    |                           |              |
| <b>13.239 (locus2)</b> | A177 : F-CAACAACAAAATGAATGACG  | 57.5               | 2                         | 20           | A177 : F-CAACAACAAAATGAATGACG     | 55.0               | 3                         | 25           |
|                        | A178 : R-ATATGCCCAATTCTGCAAGT  |                    |                           |              | A179 : R-D2*-CCTACCTTTACGCGTTT    |                    |                           |              |
| <b>pvMS8 (locus3)</b>  | A159 : F-TCCGTTGTTTTGTTGCC     | 61.0               | 3                         | 20           | A159 : F-TCCGTTGTTTTGTTGCC        | 55.0               | 1                         | 25           |
|                        | A160 : R-CACTTGTTTCGTTCCGCTC   |                    |                           |              | A161 : R-D4*-GCTAACCGATCGACCCAA   |                    |                           |              |
| <b>pvMS9 (locus4)</b>  | A162 : F-TGTGGATAAGGGGAAAAA    | 53.6               | 3                         | 20           | A163 : F-D3*-AAACGTGCGTGATAGGT    | 52.3               | 5                         | 40           |
|                        | A164 : R-TTTTTCTTGAGTTTACG     |                    |                           |              | A164 : R-TTTTTCTTGAGTTTACG        |                    |                           |              |

Denaturation and elongation temperatures were respectively 94.0°C and 72.0°C for both primary and nested PCR.

3

4
